# Supplementary material for: Lack of interleukin-33 and its receptor does not prevent calcipotriol-induced atopic dermatitis-like inflammation in mice
Source: PubMed Central journal article supplement (PMC7160114; doi:10.1038/s41598-020-63410-z), 2020-04-15

## **SUPPLEMENTARY INFORMATION**

### **Lack of interleukin-33 and its receptor does not prevent calcipotriol-induced atopic dermatitis-like inflammation in mice.**

Wojciech Pietka<sup>1,2</sup>, Olav Sundnes<sup>1,2,3</sup>, Clara Hammarström<sup>2</sup>, Manuela Zucknick<sup>4</sup>, Denis Khnykin<sup>1,2</sup> & Guttorm Haraldsen<sup>1,2,\*</sup>

<sup>1</sup>K.G.Jebsen Inflammation Research Centre, <sup>2</sup>Department of Pathology, <sup>3</sup>Department of Rheumatology, Dermatology and Infectious Diseases, <sup>4</sup>Oslo Center for Biostatistics and Epidemiology, Department of Biostatistics, Institute of Basic Medical Sciences, University of Oslo and Oslo University Hospital, Norway

\*Correspondence: Guttorm Haraldsen, Department of Pathology, Oslo University Hospital Rikshospitalet, PO Box 4950 Nydalen, NO-0424 Oslo, Norway. Phone: (+47) 23 07 14 92 Fax: (+47) 23 07 15 11. E mail: guttorm.haraldsen@medisin.uio.no

## Supplementary Figure Legends

### ***Figure S1: Genotyping of IL-33KO, ST2KO and dKO***

Panel **a** represents uncropped gel image, with a dotted line marking separate genotyping results – upper panel for IL33 and lower panel for ST2. The positions of molecular weight markers are indicated on the left in base pairs.

### ***Figure S2: Ear thickness is comparable in vehicle-treated mice***

Panel **a** shows ear thickness of vehicle-treated mice, measured on day 0 and day 8 (GraphPad Prism v7.0).

### ***Figure S3: MC903 treatment leads to similar CD3+ T cell density across groups***

Panel **a** shows representative pictures of mouse ears immunostained with CD3 antibody. Arrows indicate CD3 positive cells. Original magnification x200. Scale bar 100  $\mu\text{m}$ . Panel **b** represents quantification of CD3+ cells in epidermal compartments. Data are represented as median value (GraphPad Prism v7.0).

### ***Figure S4: Th2 cytokine expression is comparable between vehicle-treated mice***

Panel **a** represents mRNA expression of *Il4* and *Il13* in vehicle-treated mice. Data are represented as  $\Delta\text{Ct}$  (GraphPad Prism v7.0).

# Fig S1

**a**

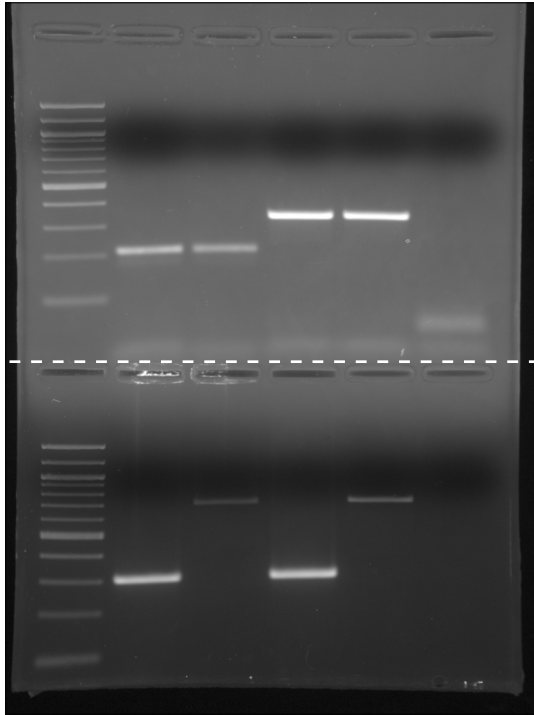

IL33 genotyping

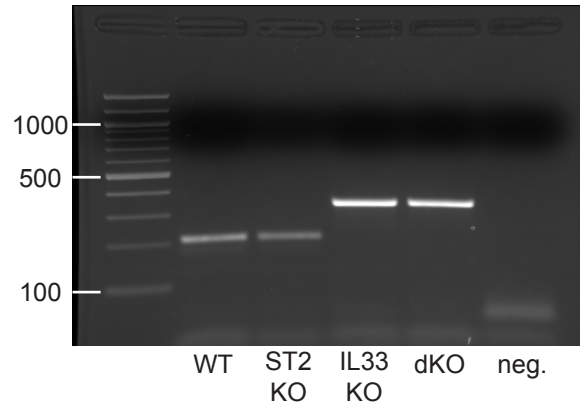

ST2 genotyping

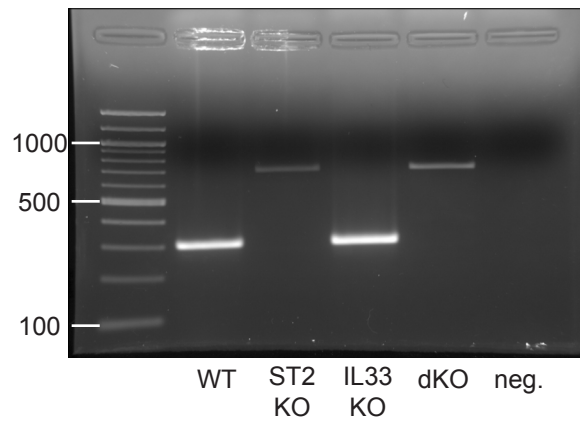

# Fig S2

**a**

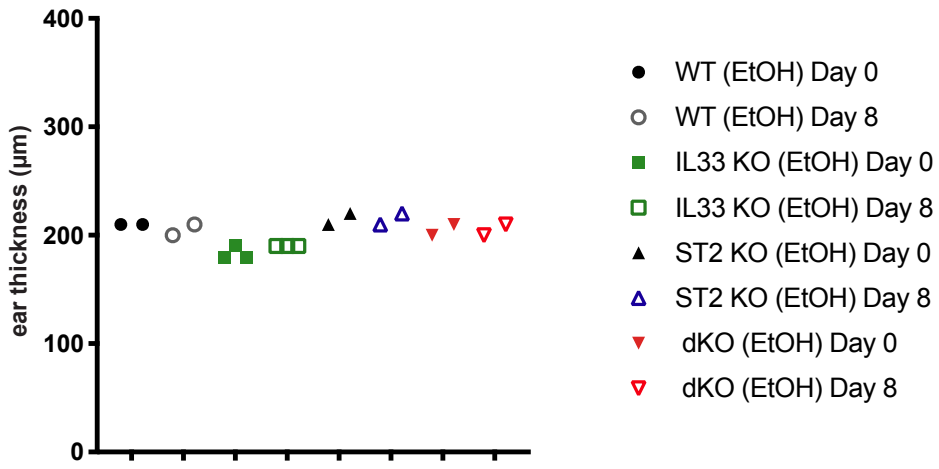



# Fig S4

a

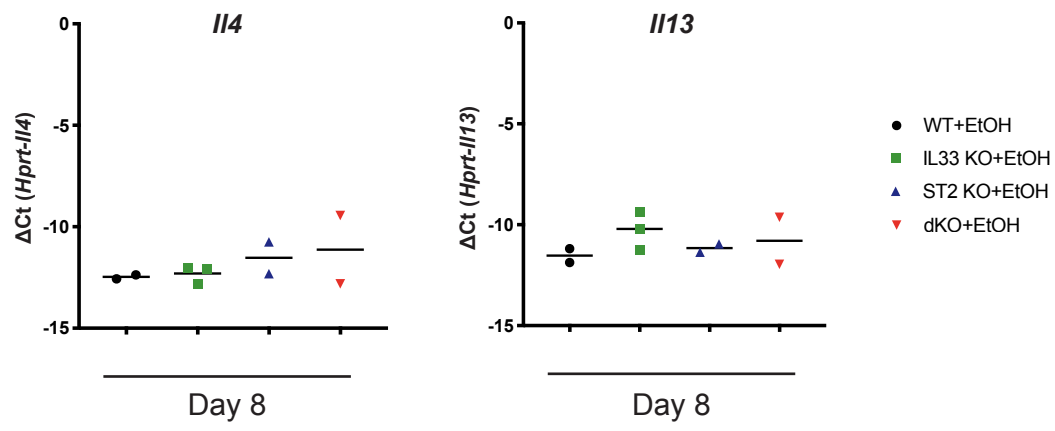

Supplement: 41598_2020_63410_MOESM1_ESM.pdf [file 41598_2020_63410_MOESM1_ESM.pdf]
